# Supplementary material for: The Impact of Different Inoculation Schemes on the Microbiota, Physicochemical and Sensory Characteristics of Greek Kopanisti Cheese throughout Production and Ripening
Source: MDPI journal article supplement (doi:10.3390/microorganisms11010066), 2022-12-26
Supplement: s1 [file s1]

**Supplementary Table S1.** Microbiological evaluation (mean log CFU mL<sup>-1</sup> or g<sup>-1</sup> ± SD) of pasteurized milk, Mana Kopanisti and Kopanisti cheese samples during ripening

| Sample           | Day | Total mesophilic bacteria | Mesophilic lactobacilli  | Thermophilic lactobacilli | Mesophilic cocci         | Thermophilic cocci        | NSLAB                    | Enterococci             | Psychrotrophic bacteria  | Enterobacteria           | Yeasts                   |
|------------------|-----|---------------------------|--------------------------|---------------------------|--------------------------|---------------------------|--------------------------|-------------------------|--------------------------|--------------------------|--------------------------|
| Pasteurized milk | -   | 3.7 ± 0.7                 | 2.5 ± 1.1                | 2.7 ± 0.9                 | 3.5 ± 0.6                | 3.3 ± 0.7                 | BDL                      | BDL                     | 0.8 ± 1.7                | BDL                      | BDL                      |
| Mana Kopanisti   | -   | BDL                       | BDL                      | BDL                       | BDL                      | BDL                       | BDL                      | BDL                     | BDL                      | BDL                      | BDL                      |
| Kopanisti A      | 1   | 9.5 ± 0.1 <sup>Aa</sup>   | 9.6 ± 0.2 <sup>Aa</sup>  | 9.6 ± 0.1 <sup>Aa</sup>   | 9.6 ± 0.2 <sup>Aa</sup>  | 9.6 ± 0.1 <sup>Aa</sup>   | 8.2 ± 0.3 <sup>Aa</sup>  | 0.9 ± 1.6 <sup>Aa</sup> | 4.6 ± 0.4 <sup>ABa</sup> | 2.3 ± 0.4 <sup>Aa</sup>  | 3.8 ± 0.3 <sup>Aa</sup>  |
|                  | 7   | 9.0 ± 0.3 <sup>ABb</sup>  | 8.7 ± 0.1 <sup>Ab</sup>  | 8.8 ± 0.2 <sup>Ab</sup>   | 8.9 ± 0.3 <sup>Ab</sup>  | 8.8 ± 0.2 <sup>Ab</sup>   | 8.6 ± 1.0 <sup>Aab</sup> | BDL                     | 5.9 ± 0.3 <sup>Aac</sup> | 0.7 ± 1.2 <sup>Aa</sup>  | 7.4 ± 0.5 <sup>Bbc</sup> |
|                  | 21  | 9.2 ± 0.1 <sup>Aab</sup>  | 9.1 ± 0.1 <sup>Ac</sup>  | 9.0 ± 0.2 <sup>Aab</sup>  | 9.1 ± 0.0 <sup>Aab</sup> | 8.9 ± 0.2 <sup>Ab</sup>   | 9.1 ± 0.2 <sup>Ab</sup>  | BDL                     | 7.5 ± 0.4 <sup>Ab</sup>  | 1.6 ± 2.8 <sup>Aa</sup>  | 7.9 ± 0.4 <sup>Ab</sup>  |
|                  | 35  | 8.7 ± 0.5 <sup>ABb</sup>  | 8.7 ± 0.4 <sup>ABb</sup> | 8.4 ± 0.7 <sup>Ab</sup>   | 8.8 ± 0.4 <sup>ABb</sup> | 8.4 ± 0.5 <sup>ABb</sup>  | 8.7 ± 0.4 <sup>Ab</sup>  | BDL                     | 6.3 ± 0.9 <sup>Abc</sup> | BDL                      | 6.6 ± 1.0 <sup>ABc</sup> |
| Kopanisti B      | 1   | 9.6 ± 0.2 <sup>Aa</sup>   | 9.4 ± 0.2 <sup>Aa</sup>  | 9.4 ± 0.2 <sup>Aa</sup>   | 9.5 ± 0.2 <sup>Aa</sup>  | 9.5 ± 0.1 <sup>Aa</sup>   | 8.2 ± 0.2 <sup>Aa</sup>  | BDL                     | 4.0 ± 0.0 <sup>Aa</sup>  | 0.7 ± 1.3 <sup>Aa</sup>  | 3.8 ± 0.3 <sup>Aa</sup>  |
|                  | 7   | 8.6 ± 0.2 <sup>Ab</sup>   | 8.5 ± 0.2 <sup>Ab</sup>  | 8.5 ± 0.2 <sup>Ab</sup>   | 8.6 ± 0.2 <sup>Ab</sup>  | 8.6 ± 0.3 <sup>Ab</sup>   | 8.6 ± 0.3 <sup>Aab</sup> | BDL                     | 4.7 ± 0.6 <sup>Aa</sup>  | BDL                      | 5.0 ± 0.6 <sup>Ab</sup>  |
|                  | 21  | 9.0 ± 0.1 <sup>Ac</sup>   | 9.0 ± 0.3 <sup>Aab</sup> | 9.0 ± 0.2 <sup>Aab</sup>  | 9.0 ± 0.2 <sup>Aab</sup> | 8.8 ± 0.4 <sup>Aab</sup>  | 9.0 ± 0.2 <sup>Ab</sup>  | 1.3 ± 2.3 <sup>Aa</sup> | 7.5 ± 0.4 <sup>Ab</sup>  | 0.5 ± 0.9 <sup>Aa</sup>  | 7.8 ± 0.4 <sup>Ac</sup>  |
|                  | 35  | 9.3 ± 0.3 <sup>Aac</sup>  | 9.0 ± 0.3 <sup>Aab</sup> | 8.9 ± 0.4 <sup>Aab</sup>  | 9.1 ± 0.4 <sup>Aab</sup> | 8.9 ± 0.5 <sup>Aab</sup>  | 9.0 ± 0.3 <sup>Ab</sup>  | BDL                     | 7.7 ± 1.4 <sup>Ab</sup>  | BDL                      | 7.9 ± 1.3 <sup>Ac</sup>  |
| Kopanisti C      | 1   | 9.6 ± 0.2 <sup>Aa</sup>   | 9.5 ± 0.2 <sup>Aa</sup>  | 9.2 ± 0.8 <sup>Aa</sup>   | 9.5 ± 0.2 <sup>Aa</sup>  | 9.7 ± 0.2 <sup>Aa</sup>   | 7.1 ± 0.4 <sup>Ca</sup>  | 0.8 ± 1.4 <sup>Aa</sup> | 3.5 ± 0.4 <sup>Aa</sup>  | 1.5 ± 0.9 <sup>Aa</sup>  | 3.3 ± 0.2 <sup>Aa</sup>  |
|                  | 7   | 8.9 ± 0.2 <sup>ABb</sup>  | 8.3 ± 0.1 <sup>Ab</sup>  | 8.3 ± 0.2 <sup>ACb</sup>  | 8.5 ± 0.2 <sup>Ab</sup>  | 8.4 ± 0.3 <sup>Ab</sup>   | 8.3 ± 0.2 <sup>ABb</sup> | BDL                     | 7.2 ± 0.7 <sup>Cb</sup>  | 0.3 ± 0.6 <sup>Aab</sup> | 7.5 ± 0.2 <sup>Bb</sup>  |
|                  | 21  | 9.1 ± 0.1 <sup>Aab</sup>  | 9.1 ± 0.1 <sup>Ac</sup>  | 9.0 ± 0.1 <sup>Aab</sup>  | 9.0 ± 0.0 <sup>Aab</sup> | 9.0 ± 0.1 <sup>Ac</sup>   | 9.1 ± 0.1 <sup>Ac</sup>  | BDL                     | 7.2 ± 0.6 <sup>Ab</sup>  | BDL                      | 7.3 ± 0.4 <sup>ABc</sup> |
|                  | 35  | 8.7 ± 0.4 <sup>ABb</sup>  | 8.7 ± 0.3 <sup>ABd</sup> | 8.5 ± 0.5 <sup>Aab</sup>  | 8.7 ± 0.3 <sup>ABb</sup> | 8.6 ± 0.4 <sup>ABbc</sup> | 8.5 ± 0.3 <sup>ABb</sup> | BDL                     | 6.6 ± 1.2 <sup>Ab</sup>  | BDL                      | 6.3 ± 1.2 <sup>ABc</sup> |
| Kopanisti D      | 1   | 9.4 ± 0.1 <sup>Aa</sup>   | 7.9 ± 0.2 <sup>Ba</sup>  | 7.8 ± 0.2 <sup>Ba</sup>   | 9.2 ± 0.5 <sup>Aa</sup>  | 9.5 ± 0.1 <sup>Aa</sup>   | BDL                      | 2.1 ± 2.4 <sup>Aa</sup> | 6.3 ± 1.8 <sup>Ba</sup>  | 1.7 ± 1.4 <sup>Aa</sup>  | 3.4 ± 0.3 <sup>Aa</sup>  |
|                  | 7   | 9.2 ± 0.0 <sup>Ba</sup>   | 6.9 ± 0.5 <sup>Bb</sup>  | 7.6 ± 0.1 <sup>Ba</sup>   | 8.9 ± 1.0 <sup>Aa</sup>  | 9.4 ± 0.2 <sup>Ba</sup>   | 6.9 ± 1.7 <sup>Bb</sup>  | BDL                     | 8.5 ± 0.0 <sup>Ba</sup>  | BDL                      | 7.3 ± 0.7 <sup>Bb</sup>  |
|                  | 21  | 8.7 ± 0.0 <sup>Bb</sup>   | 8.7 ± 0.1 <sup>ABc</sup> | 8.0 ± 0.3 <sup>Ba</sup>   | 8.9 ± 0.2 <sup>Aa</sup>  | 8.7 ± 0.1 <sup>Ab</sup>   | 8.7 ± 0.1 <sup>Bc</sup>  | BDL                     | 7.7 ± 0.3 <sup>Aa</sup>  | BDL                      | 6.1 ± 0.6 <sup>Bb</sup>  |
|                  | 35  | 8.3 ± 0.0 <sup>Bb</sup>   | 8.3 ± 0.3 <sup>Bac</sup> | 7.2 ± 0.1 <sup>Ba</sup>   | 8.3 ± 0.3 <sup>Ba</sup>  | 8.1 ± 0.2 <sup>Bc</sup>   | 8.2 ± 0.2 <sup>Bbc</sup> | BDL                     | 6.7 ± 1.3 <sup>Aa</sup>  | BDL                      | 5.0 ± 1.5 <sup>Bab</sup> |

Different capital letters within the same column indicate statistically significant differences ( $P < 0.05$ ) among the Kopanisti samples (A-D) at the same day of ripening (1-35)

Different lowercase letters within the same column indicate statistically significant differences ( $P < 0.05$ ) among the days of ripening (1-35) per Kopanisti sample (A-D)

Below Detection Limit (BDL):

DL for pasteurized milk was < 1.0 log CFU mL<sup>-1</sup> for total mesophilic bacteria, mesophilic and thermophilic lactobacilli and cocci, NSLAB, psychrotrophic bacteria and enterobacteria (pouring inoculation method) and 1.0 log CFU mL<sup>-1</sup> for enterococci and yeasts (spreading inoculation method)

DL for Mana Kopanisti and Kopanisti was 1.0 log CFU g<sup>-1</sup> for total mesophilic bacteria, mesophilic and thermophilic lactobacilli and cocci, NSLAB, psychrotrophic bacteria and enterobacteria (pouring inoculation method) and 2.0 log CFU g<sup>-1</sup> for enterococci and yeasts (spreading inoculation method)

**Supplementary Table S5.** Physicochemical evaluation (mean values  $\pm$  SD) of Mana Kopanisti and Kopanisti cheese samples during ripening

| Kopanisti      | Day | pH                            | Moisture (% w/w)                | SIM (% w/w)                    | Ash (% w/w)                   | FDM (% w/w)                    | Protein (% w/w)                 |
|----------------|-----|-------------------------------|---------------------------------|--------------------------------|-------------------------------|--------------------------------|---------------------------------|
| Mana Kopanisti | -   | 5.16 $\pm$ 0.03               | 42.39 $\pm$ 0.75                | 10.12 $\pm$ 0.20               | 6.15 $\pm$ 0.06               | 53.44 $\pm$ 0.90               | 22.52 $\pm$ 1.32                |
| A              | 1   | 4.16 $\pm$ 0.03 <sup>Aa</sup> | 58.07 $\pm$ 0.80 <sup>Aa</sup>  | 3.28 $\pm$ 0.11 <sup>Aa</sup>  | 2.91 $\pm$ 0.10 <sup>Aa</sup> | 48.47 $\pm$ 1.66 <sup>Aa</sup> | 15.61 $\pm$ 1.45 <sup>Aa</sup>  |
|                | 7   | 4.38 $\pm$ 0.13 <sup>Aa</sup> | 58.45 $\pm$ 2.84 <sup>Aa</sup>  | 3.39 $\pm$ 0.20 <sup>Aa</sup>  | 2.95 $\pm$ 0.12 <sup>Aa</sup> | 51.14 $\pm$ 2.87 <sup>Aa</sup> | 15.88 $\pm$ 1.31 <sup>Aa</sup>  |
|                | 21  | 5.26 $\pm$ 0.15 <sup>Ab</sup> | 56.90 $\pm$ 2.65 <sup>Aa</sup>  | 3.53 $\pm$ 0.18 <sup>Aa</sup>  | 3.01 $\pm$ 0.10 <sup>Aa</sup> | 52.62 $\pm$ 1.46 <sup>Aa</sup> | 16.64 $\pm$ 1.24 <sup>Aa</sup>  |
|                | 35  | 5.29 $\pm$ 0.25 <sup>Ab</sup> | 56.31 $\pm$ 1.45 <sup>Aa</sup>  | 3.62 $\pm$ 0.31 <sup>Aa</sup>  | 3.21 $\pm$ 0.11 <sup>Aa</sup> | 52.89 $\pm$ 2.36 <sup>Aa</sup> | 17.04 $\pm$ 0.85 <sup>Aa</sup>  |
| B              | 1   | 4.61 $\pm$ 0.15 <sup>Ba</sup> | 55.23 $\pm$ 1.23 <sup>Aa</sup>  | 3.80 $\pm$ 0.50 <sup>Aa</sup>  | 3.21 $\pm$ 0.47 <sup>Aa</sup> | 47.95 $\pm$ 2.84 <sup>Aa</sup> | 15.65 $\pm$ 1.34 <sup>Aa</sup>  |
|                | 7   | 4.45 $\pm$ 0.11 <sup>Aa</sup> | 53.48 $\pm$ 1.44 <sup>Aab</sup> | 4.18 $\pm$ 0.46 <sup>Aa</sup>  | 3.25 $\pm$ 0.46 <sup>Aa</sup> | 50.87 $\pm$ 1.22 <sup>Aa</sup> | 16.73 $\pm$ 1.52 <sup>Aa</sup>  |
|                | 21  | 4.69 $\pm$ 0.52 <sup>Aa</sup> | 49.60 $\pm$ 1.73 <sup>Abc</sup> | 5.01 $\pm$ 0.62 <sup>Bab</sup> | 3.40 $\pm$ 0.54 <sup>Aa</sup> | 51.24 $\pm$ 0.78 <sup>Aa</sup> | 18.72 $\pm$ 1.24 <sup>Aab</sup> |
|                | 35  | 5.31 $\pm$ 0.73 <sup>Aa</sup> | 45.23 $\pm$ 3.25 <sup>Bc</sup>  | 6.11 $\pm$ 0.98 <sup>Bb</sup>  | 3.48 $\pm$ 0.46 <sup>Aa</sup> | 51.73 $\pm$ 0.98 <sup>Aa</sup> | 20.95 $\pm$ 1.34 <sup>Bb</sup>  |
| C              | 1   | 4.18 $\pm$ 0.02 <sup>Aa</sup> | 58.39 $\pm$ 3.73 <sup>Aa</sup>  | 3.35 $\pm$ 0.32 <sup>Aa</sup>  | 2.76 $\pm$ 0.19 <sup>Aa</sup> | 52.22 $\pm$ 2.39 <sup>Aa</sup> | 15.94 $\pm$ 0.85 <sup>Aa</sup>  |
|                | 7   | 4.21 $\pm$ 0.04 <sup>Aa</sup> | 57.92 $\pm$ 5.70 <sup>Aa</sup>  | 3.40 $\pm$ 0.17 <sup>Aa</sup>  | 2.82 $\pm$ 0.06 <sup>Aa</sup> | 53.24 $\pm$ 1.54 <sup>Aa</sup> | 16.14 $\pm$ 0.74 <sup>Aa</sup>  |
|                | 21  | 4.85 $\pm$ 0.32 <sup>Aa</sup> | 57.26 $\pm$ 2.52 <sup>Aa</sup>  | 3.57 $\pm$ 0.19 <sup>Aa</sup>  | 2.89 $\pm$ 0.09 <sup>Aa</sup> | 54.54 $\pm$ 1.68 <sup>Aa</sup> | 16.48 $\pm$ 0.35 <sup>Aa</sup>  |
|                | 35  | 4.88 $\pm$ 0.42 <sup>Aa</sup> | 56.67 $\pm$ 2.86 <sup>Aa</sup>  | 3.70 $\pm$ 0.41 <sup>Aa</sup>  | 3.05 $\pm$ 0.11 <sup>Aa</sup> | 55.23 $\pm$ 1.99 <sup>Aa</sup> | 16.98 $\pm$ 0.62 <sup>Aa</sup>  |
| D              | 1   | 4.69 $\pm$ 0.19 <sup>Ba</sup> | 57.48 $\pm$ 2.19 <sup>Aa</sup>  | 2.95 $\pm$ 0.70 <sup>Aa</sup>  | 2.68 $\pm$ 0.54 <sup>Aa</sup> | 50.30 $\pm$ 2.85 <sup>Aa</sup> | 15.89 $\pm$ 0.62 <sup>Aa</sup>  |
|                | 7   | 4.74 $\pm$ 0.17 <sup>Aa</sup> | 56.67 $\pm$ 2.20 <sup>Aa</sup>  | 3.07 $\pm$ 0.69 <sup>Aa</sup>  | 2.75 $\pm$ 0.54 <sup>Aa</sup> | 51.73 $\pm$ 2.43 <sup>Aa</sup> | 16.05 $\pm$ 0.35 <sup>Aa</sup>  |
|                | 21  | 4.49 $\pm$ 0.26 <sup>Aa</sup> | 54.99 $\pm$ 2.47 <sup>Aa</sup>  | 3.38 $\pm$ 0.87 <sup>Aa</sup>  | 2.88 $\pm$ 0.36 <sup>Aa</sup> | 53.00 $\pm$ 0.88 <sup>Aa</sup> | 17.21 $\pm$ 0.07 <sup>Aa</sup>  |
|                | 35  | 4.47 $\pm$ 0.30 <sup>Aa</sup> | 53.05 $\pm$ 1.67 <sup>Aa</sup>  | 3.78 $\pm$ 0.87 <sup>Aa</sup>  | 3.11 $\pm$ 0.54 <sup>Aa</sup> | 53.45 $\pm$ 2.23 <sup>Aa</sup> | 17.79 $\pm$ 0.18 <sup>Aa</sup>  |

Salt in moisture (SIM)

Fat in dry matter (FDM)

Different capital letters within the same column indicate statistically significant differences ( $P < 0.05$ ) among the Kopanisti samples (A-D) at the same day of ripening (1-35).

Different lowercase letters within the same column indicate statistically significant differences ( $P < 0.05$ ) among the days of ripening (1-35) per Kopanisti sample (A-D).
